# Supplementary material for: Breast ultrasound knobology and the knobology of twinkling for marker detection
Source: PubMed Central journal article supplement — Transl Breast Cancer Res. 2024 Oct 29;5:28. doi: 10.21037/tbcr-24-30 (PMC11557156; doi:10.21037/tbcr-24-30), 2024-10-29

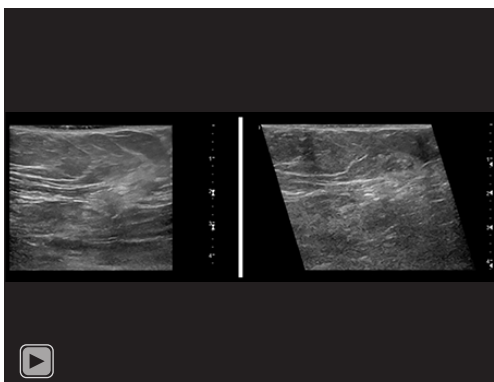

**Video S1** This ultrasound cine clip demonstrates a fine-needle aspiration of an axillary lymph node without (left) and with (right) steering. The needle and its tip are seen (arrows).

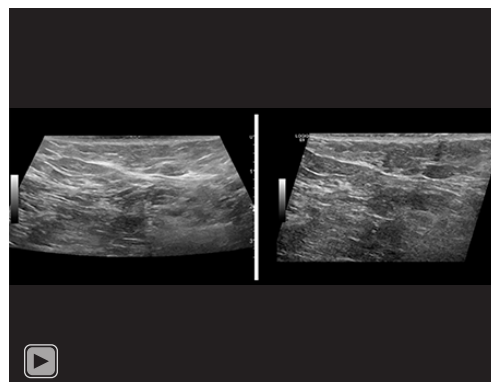

**Video S2** This is another ultrasound cine clip demonstrating a fine-needle aspiration of an axillary lymph node without (left) and with (right) steering. The needle and its tip are seen (arrows).

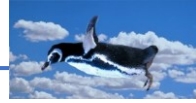

## Penguins Can't Fly Gracefully South

### Probe

- GE Loqiq E9 & E10

| Parameter                 | ML6-15                              | 9L                          | C1-6                             |
|---------------------------|-------------------------------------|-----------------------------|----------------------------------|
| B-mode for Breast         | Excellent                           | Mid-range                   | Poor                             |
| Twinkling                 | Poor                                | Mid-range                   | Excellent                        |
| Depth                     | Superficial                         | Mid-range                   | Deep (Abdominal)                 |
| Color Doppler Frequencies | 6.3, 7.5, 8.3, 10.0, 11.9, 12.5 MHz | 3.1, 3.6, 4.2, 5.0, 6.3 MHz | 1.7, 1.9, 2.1, 2.5, 3.1, 3.6 MHz |

- Transducer names imply frequency bandwidth (range)
- ACR Breast Ultrasound Requirements: ML6-15

### Color Doppler

- Most often used for blood flow quantification
- B-mode Transmit Frequency
  - Determines frequency used for grayscale image
- Color Doppler Transmit Frequency
  - Used for flow velocity evaluation

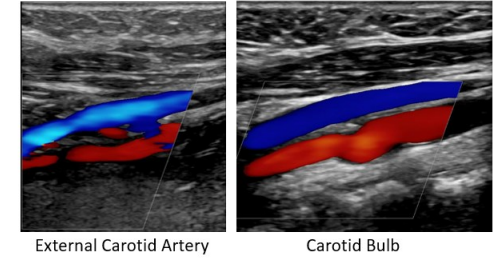

$$f_d = \frac{2f_0 v \cos \theta}{c}$$

$$v = \frac{f_d c}{2f_0 \cos \theta}$$

$f_d$ : Doppler shift, Hz  
 $f_0$ : Doppler transmit frequency, MHz  
 $v$ : Flow velocity, m/s (cm/s)  
 $c$ : Sound speed (1540 m/s)  
 $\theta$ : Angle between US beam and vessel

### Frequency

- Frequency is selectable and will change the scale due to the relationship between transmit frequency and velocity for a given Doppler shift.
  - This can be changed to see if twinkling improves.
  - Typically, lower transmit frequencies lead to better twinkling.

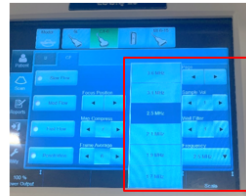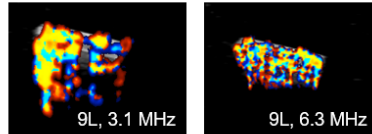

| Parameter                 | ML6-15                              | 9L                          | C1-6                             |
|---------------------------|-------------------------------------|-----------------------------|----------------------------------|
| Color Doppler Frequencies | 6.3, 7.5, 8.3, 10.0, 11.9, 12.5 MHz | 3.1, 3.6, 4.2, 5.0, 6.3 MHz | 1.7, 1.9, 2.1, 2.5, 3.1, 3.6 MHz |

### Gain

- The Doppler gain is related to the strength of the ultrasound signal and will affect the appearance of the twinkling.
  - Typical starting values are 15-20
- High values of gain may introduce noise from hand motion.
- Low values of gain may suppress twinkling signals.

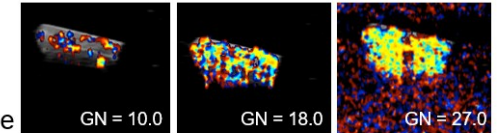

CF Gain (Turn Knob)

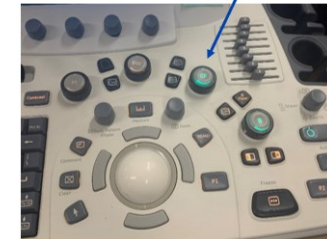

### Scale

- If the twinkling is strong, scale may not change the appearance drastically.
- If the twinkling is weak, lowering the scale is advised.

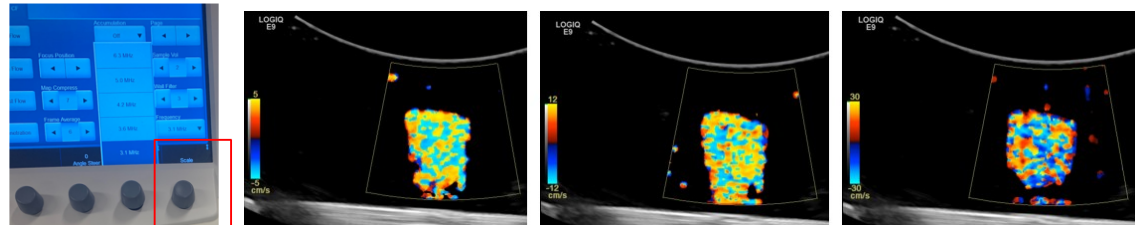

Supplement: tbcr-05-28-supplementary.pdf [file tbcr-05-28-supplementary.pdf]
