# Supplementary material for: Breast ultrasound knobology and the knobology of twinkling for marker detection
Source: PubMed Central journal article supplement — Transl Breast Cancer Res. 2024 Oct 29;5:28. doi: 10.21037/tbcr-24-30 (PMC11557156; doi:10.21037/tbcr-24-30), 2024-10-29
Supplement: tbcr-05-28-coif.pdf [file tbcr-05-28-coif.pdf]

## ICMJE DISCLOSURE FORM

Date: September 20, 2024

Your Name: Christine U. Lee

Manuscript Title: Breast Ultrasound Knobology and the Knobology for Marker Detection

Manuscript number (if known): TBCR-24-30

In the interest of transparency, we ask you to disclose all relationships/activities/interests listed below that are related to the content of your manuscript. "Related" means any relation with for-profit or not-for-profit third parties whose interests may be affected by the content of the manuscript. Disclosure represents a commitment to transparency and does not necessarily indicate a bias. If you are in doubt about whether to list a relationship/activity/interest, it is preferable that you do so.

The following questions apply to the author's relationships/activities/interests as they relate to the current manuscript only.

The author's relationships/activities/interests should be defined broadly. For example, if your manuscript pertains to the epidemiology of hypertension, you should declare all relationships with manufacturers of antihypertensive medication, even if that medication is not mentioned in the manuscript.

In item #1 below, report all support for the work reported in this manuscript without time limit. For all other items, the time frame for disclosure is the past 36 months.

|                                                           |                                                                                                                                                                                | Name all entities with whom you have this relationship or indicate none (add rows as needed) | Specifications/Comments (e.g., if payments were made to you or to your institution)                             |
|-----------------------------------------------------------|--------------------------------------------------------------------------------------------------------------------------------------------------------------------------------|----------------------------------------------------------------------------------------------|-----------------------------------------------------------------------------------------------------------------|
| <b>Time frame: Since the initial planning of the work</b> |                                                                                                                                                                                |                                                                                              |                                                                                                                 |
| 1                                                         | All support for the present manuscript (e.g., funding, provision of study materials, medical writing, article processing charges, etc.)<br><b>No time limit for this item.</b> | National Institutes of Health (NIH)                                                          | Funding to Mayo Clinic through grant R01 EB033008 (Pis: Christine Lee and Matthew Urban)                        |
|                                                           |                                                                                                                                                                                | Mayo Clinic                                                                                  | Funding from an internal Mayo Clinic Discovery Translation Program award (Pis: Christine Lee and Matthew Urban) |
|                                                           |                                                                                                                                                                                |                                                                                              |                                                                                                                 |
|                                                           |                                                                                                                                                                                |                                                                                              |                                                                                                                 |
|                                                           |                                                                                                                                                                                |                                                                                              |                                                                                                                 |
|                                                           |                                                                                                                                                                                |                                                                                              |                                                                                                                 |
| <b>Time frame: past 36 months</b>                         |                                                                                                                                                                                |                                                                                              |                                                                                                                 |
| 2                                                         | Grants or contracts from any entity (if not indicated in item #1 above).                                                                                                       | National Institutes of Health (NIH)                                                          | Funding to Mayo Clinic through grant R01 EB033008 (Pis: Christine Lee and Matthew Urban)                        |
|                                                           |                                                                                                                                                                                | Mayo Clinic                                                                                  | Funding from an internal Mayo Clinic Discovery Translation Program award (Pis: Christine Lee and Matthew Urban) |
|                                                           |                                                                                                                                                                                |                                                                                              |                                                                                                                 |

|    |                                                                                                              |                               |                                                                                                                         |
|----|--------------------------------------------------------------------------------------------------------------|-------------------------------|-------------------------------------------------------------------------------------------------------------------------|
| 3  | Royalties or licenses                                                                                        | <input type="checkbox"/> None |                                                                                                                         |
| 4  | Consulting fees                                                                                              | <input type="checkbox"/> None |                                                                                                                         |
| 5  | Payment or honoraria for lectures, presentations, speakers bureaus, manuscript writing or educational events | <input type="checkbox"/> None |                                                                                                                         |
| 6  | Payment for expert testimony                                                                                 | <input type="checkbox"/> None |                                                                                                                         |
| 7  | Support for attending meetings and/or travel                                                                 | <input type="checkbox"/> None |                                                                                                                         |
| 8  | Patents planned, issued or pending                                                                           | Pending US Patent             | 17/398,778: Localizing medical instruments using Doppler Ultrasound Twinkling Artifact Signatures                       |
|    |                                                                                                              | Pending Provisional Patent    | 63/571,622 Vendor Agnostic Tracking of Doppler Ultrasound Twinkling                                                     |
|    |                                                                                                              | Pending EPO and US Patents    | EPO: 20786193.1 Non-metallic Ultrasound Detectable Markers<br>US: 17/762,018 Non-metallic Ultrasound Detectable Markers |
| 9  | Participation on a Data Safety Monitoring Board or Advisory Board                                            | <input type="checkbox"/> None |                                                                                                                         |
| 10 | Leadership or fiduciary role in other board, society, committee or advocacy group, paid or unpaid            | <input type="checkbox"/> None |                                                                                                                         |
| 11 | Stock or stock options                                                                                       | <input type="checkbox"/> None |                                                                                                                         |
| 12 | Receipt of equipment, materials, drugs, medical writing, gifts or other services                             | <input type="checkbox"/> None |                                                                                                                         |
| 13 | Other financial or non-financial interests                                                                   | <input type="checkbox"/> None |                                                                                                                         |

**Please summarize the above conflict of interest in the following box:**

Funding from R01 EB033008 and Mayo Clinic Discovery Translation Award, Patents pending related to utilization of Doppler twinkling artifact to locate markers and other objects

Please place an "X" next to the following statement to indicate your agreement:

I certify that I have answered every question and have not altered the wording of any of the questions on this form.

## ICMJE DISCLOSURE FORM

Date: September 20, 2024

Your Name: Gina K. Hesley

Manuscript Title: Breast Ultrasound Knobology and the Knobology for Marker Detection

Manuscript number (if known): TBCR-24-30

In the interest of transparency, we ask you to disclose all relationships/activities/interests listed below that are related to the content of your manuscript. "Related" means any relation with for-profit or not-for-profit third parties whose interests may be affected by the content of the manuscript. Disclosure represents a commitment to transparency and does not necessarily indicate a bias. If you are in doubt about whether to list a relationship/activity/interest, it is preferable that you do so.

The following questions apply to the author's relationships/activities/interests as they relate to the current manuscript only.

The author's relationships/activities/interests should be defined broadly. For example, if your manuscript pertains to the epidemiology of hypertension, you should declare all relationships with manufacturers of antihypertensive medication, even if that medication is not mentioned in the manuscript.

In item #1 below, report all support for the work reported in this manuscript without time limit. For all other items, the time frame for disclosure is the past 36 months.

|                                                           |                                                                                                                                                                                | Name all entities with whom you have this relationship or indicate none (add rows as needed) | Specifications/Comments (e.g., if payments were made to you or to your institution)                             |
|-----------------------------------------------------------|--------------------------------------------------------------------------------------------------------------------------------------------------------------------------------|----------------------------------------------------------------------------------------------|-----------------------------------------------------------------------------------------------------------------|
| <b>Time frame: Since the initial planning of the work</b> |                                                                                                                                                                                |                                                                                              |                                                                                                                 |
| 1                                                         | All support for the present manuscript (e.g., funding, provision of study materials, medical writing, article processing charges, etc.)<br><b>No time limit for this item.</b> | National Institutes of Health (NIH)                                                          | Funding to Mayo Clinic through grant R01 EB033008 (Pis: Christine Lee and Matthew Urban)                        |
|                                                           |                                                                                                                                                                                | Mayo Clinic                                                                                  | Funding from an internal Mayo Clinic Discovery Translation Program award (Pis: Christine Lee and Matthew Urban) |
|                                                           |                                                                                                                                                                                |                                                                                              |                                                                                                                 |
|                                                           |                                                                                                                                                                                |                                                                                              |                                                                                                                 |
|                                                           |                                                                                                                                                                                |                                                                                              |                                                                                                                 |
|                                                           |                                                                                                                                                                                |                                                                                              |                                                                                                                 |
| <b>Time frame: past 36 months</b>                         |                                                                                                                                                                                |                                                                                              |                                                                                                                 |
| 2                                                         | Grants or contracts from any entity (if not indicated in item #1 above).                                                                                                       | National Institutes of Health (NIH)                                                          | Funding to Mayo Clinic through grant R01 EB033008 (Pis: Christine Lee and Matthew Urban)                        |
|                                                           |                                                                                                                                                                                | Mayo Clinic                                                                                  | Funding from an internal Mayo Clinic Discovery Translation Program award (Pis: Christine Lee and Matthew Urban) |
|                                                           |                                                                                                                                                                                |                                                                                              |                                                                                                                 |

|    |                                                                                                              |                                        |  |
|----|--------------------------------------------------------------------------------------------------------------|----------------------------------------|--|
| 3  | Royalties or licenses                                                                                        | <input type="checkbox"/> <u>X</u> None |  |
|    |                                                                                                              |                                        |  |
|    |                                                                                                              |                                        |  |
| 4  | Consulting fees                                                                                              | <input type="checkbox"/> <u>X</u> None |  |
|    |                                                                                                              |                                        |  |
|    |                                                                                                              |                                        |  |
| 5  | Payment or honoraria for lectures, presentations, speakers bureaus, manuscript writing or educational events | <input type="checkbox"/> <u>X</u> None |  |
|    |                                                                                                              |                                        |  |
|    |                                                                                                              |                                        |  |
| 6  | Payment for expert testimony                                                                                 | <input type="checkbox"/> <u>X</u> None |  |
|    |                                                                                                              |                                        |  |
|    |                                                                                                              |                                        |  |
| 7  | Support for attending meetings and/or travel                                                                 | <input type="checkbox"/> <u>X</u> None |  |
|    |                                                                                                              |                                        |  |
|    |                                                                                                              |                                        |  |
| 8  | Patents planned, issued or pending                                                                           | <input type="checkbox"/> <u>X</u> None |  |
|    |                                                                                                              |                                        |  |
|    |                                                                                                              |                                        |  |
| 9  | Participation on a Data Safety Monitoring Board or Advisory Board                                            | <input type="checkbox"/> <u>X</u> None |  |
|    |                                                                                                              |                                        |  |
|    |                                                                                                              |                                        |  |
| 10 | Leadership or fiduciary role in other board, society, committee or advocacy group, paid or unpaid            | <input type="checkbox"/> <u>X</u> None |  |
|    |                                                                                                              |                                        |  |
|    |                                                                                                              |                                        |  |
| 11 | Stock or stock options                                                                                       | <input type="checkbox"/> <u>X</u> None |  |
|    |                                                                                                              |                                        |  |
|    |                                                                                                              |                                        |  |
| 12 | Receipt of equipment, materials, drugs, medical writing, gifts or other services                             | <input type="checkbox"/> <u>X</u> None |  |
|    |                                                                                                              |                                        |  |
|    |                                                                                                              |                                        |  |
| 13 | Other financial or non-financial interests                                                                   | <input type="checkbox"/> <u>X</u> None |  |
|    |                                                                                                              |                                        |  |
|    |                                                                                                              |                                        |  |

**Please summarize the above conflict of interest in the following box:**

Funding from R01 EB033008 and Mayo Clinic Discovery Translation Award

**Please place an "X" next to the following statement to indicate your agreement:**

I certify that I have answered every question and have not altered the wording of any of the questions on this form.

## ICMJE DISCLOSURE FORM

Date: September 20, 2024

Your Name: Taylor A. Pierson

Manuscript Title: Breast Ultrasound Knobology and the Knobology for Marker Detection

Manuscript number (if known): TBCR-24-30

In the interest of transparency, we ask you to disclose all relationships/activities/interests listed below that are related to the content of your manuscript. "Related" means any relation with for-profit or not-for-profit third parties whose interests may be affected by the content of the manuscript. Disclosure represents a commitment to transparency and does not necessarily indicate a bias. If you are in doubt about whether to list a relationship/activity/interest, it is preferable that you do so.

The following questions apply to the author's relationships/activities/interests as they relate to the current manuscript only.

The author's relationships/activities/interests should be defined broadly. For example, if your manuscript pertains to the epidemiology of hypertension, you should declare all relationships with manufacturers of antihypertensive medication, even if that medication is not mentioned in the manuscript.

In item #1 below, report all support for the work reported in this manuscript without time limit. For all other items, the time frame for disclosure is the past 36 months.

|                                                           |                                                                                                                                                                                | Name all entities with whom you have this relationship or indicate none (add rows as needed) | Specifications/Comments (e.g., if payments were made to you or to your institution)                             |
|-----------------------------------------------------------|--------------------------------------------------------------------------------------------------------------------------------------------------------------------------------|----------------------------------------------------------------------------------------------|-----------------------------------------------------------------------------------------------------------------|
| <b>Time frame: Since the initial planning of the work</b> |                                                                                                                                                                                |                                                                                              |                                                                                                                 |
| 1                                                         | All support for the present manuscript (e.g., funding, provision of study materials, medical writing, article processing charges, etc.)<br><b>No time limit for this item.</b> | National Institutes of Health (NIH)                                                          | Funding to Mayo Clinic through grant R01 EB033008 (Pis: Christine Lee and Matthew Urban)                        |
|                                                           |                                                                                                                                                                                | Mayo Clinic                                                                                  | Funding from an internal Mayo Clinic Discovery Translation Program award (Pis: Christine Lee and Matthew Urban) |
|                                                           |                                                                                                                                                                                |                                                                                              |                                                                                                                 |
|                                                           |                                                                                                                                                                                |                                                                                              |                                                                                                                 |
|                                                           |                                                                                                                                                                                |                                                                                              |                                                                                                                 |
|                                                           |                                                                                                                                                                                |                                                                                              |                                                                                                                 |
| <b>Time frame: past 36 months</b>                         |                                                                                                                                                                                |                                                                                              |                                                                                                                 |
| 2                                                         | Grants or contracts from any entity (if not indicated in item #1 above).                                                                                                       | National Institutes of Health (NIH)                                                          | Funding to Mayo Clinic through grant R01 EB033008 (Pis: Christine Lee and Matthew Urban)                        |
|                                                           |                                                                                                                                                                                | Mayo Clinic                                                                                  | Funding from an internal Mayo Clinic Discovery Translation Program award (Pis: Christine Lee and Matthew Urban) |
|                                                           |                                                                                                                                                                                |                                                                                              |                                                                                                                 |

|    |                                                                                                              |                                        |  |
|----|--------------------------------------------------------------------------------------------------------------|----------------------------------------|--|
| 3  | Royalties or licenses                                                                                        | <input type="checkbox"/> <u>X</u> None |  |
|    |                                                                                                              |                                        |  |
|    |                                                                                                              |                                        |  |
| 4  | Consulting fees                                                                                              | <input type="checkbox"/> <u>X</u> None |  |
|    |                                                                                                              |                                        |  |
|    |                                                                                                              |                                        |  |
| 5  | Payment or honoraria for lectures, presentations, speakers bureaus, manuscript writing or educational events | <input type="checkbox"/> <u>X</u> None |  |
|    |                                                                                                              |                                        |  |
|    |                                                                                                              |                                        |  |
| 6  | Payment for expert testimony                                                                                 | <input type="checkbox"/> <u>X</u> None |  |
|    |                                                                                                              |                                        |  |
|    |                                                                                                              |                                        |  |
| 7  | Support for attending meetings and/or travel                                                                 | <input type="checkbox"/> <u>X</u> None |  |
|    |                                                                                                              |                                        |  |
|    |                                                                                                              |                                        |  |
| 8  | Patents planned, issued or pending                                                                           | <input type="checkbox"/> <u>X</u> None |  |
|    |                                                                                                              |                                        |  |
|    |                                                                                                              |                                        |  |
| 9  | Participation on a Data Safety Monitoring Board or Advisory Board                                            | <input type="checkbox"/> <u>X</u> None |  |
|    |                                                                                                              |                                        |  |
|    |                                                                                                              |                                        |  |
| 10 | Leadership or fiduciary role in other board, society, committee or advocacy group, paid or unpaid            | <input type="checkbox"/> <u>X</u> None |  |
|    |                                                                                                              |                                        |  |
|    |                                                                                                              |                                        |  |
| 11 | Stock or stock options                                                                                       | <input type="checkbox"/> <u>X</u> None |  |
|    |                                                                                                              |                                        |  |
|    |                                                                                                              |                                        |  |
| 12 | Receipt of equipment, materials, drugs, medical writing, gifts or other services                             | <input type="checkbox"/> <u>X</u> None |  |
|    |                                                                                                              |                                        |  |
|    |                                                                                                              |                                        |  |
| 13 | Other financial or non-financial interests                                                                   | <input type="checkbox"/> <u>X</u> None |  |
|    |                                                                                                              |                                        |  |
|    |                                                                                                              |                                        |  |

**Please summarize the above conflict of interest in the following box:**

Funding from R01 EB033008 and Mayo Clinic Discovery Translation Award

**Please place an "X" next to the following statement to indicate your agreement:**



I certify that I have answered every question and have not altered the wording of any of the questions on this form.

## ICMJE DISCLOSURE FORM

Date: September 20, 2024

Your Name: Rebecca L. Higgins

Manuscript Title: Breast Ultrasound Knobology and the Knobology for Marker Detection

Manuscript number (if known): TBCR-24-30

In the interest of transparency, we ask you to disclose all relationships/activities/interests listed below that are related to the content of your manuscript. "Related" means any relation with for-profit or not-for-profit third parties whose interests may be affected by the content of the manuscript. Disclosure represents a commitment to transparency and does not necessarily indicate a bias. If you are in doubt about whether to list a relationship/activity/interest, it is preferable that you do so.

The following questions apply to the author's relationships/activities/interests as they relate to the current manuscript only.

The author's relationships/activities/interests should be defined broadly. For example, if your manuscript pertains to the epidemiology of hypertension, you should declare all relationships with manufacturers of antihypertensive medication, even if that medication is not mentioned in the manuscript.

In item #1 below, report all support for the work reported in this manuscript without time limit. For all other items, the time frame for disclosure is the past 36 months.

|                                                           |                                                                                                                                                                                | Name all entities with whom you have this relationship or indicate none (add rows as needed) | Specifications/Comments (e.g., if payments were made to you or to your institution)                             |
|-----------------------------------------------------------|--------------------------------------------------------------------------------------------------------------------------------------------------------------------------------|----------------------------------------------------------------------------------------------|-----------------------------------------------------------------------------------------------------------------|
| <b>Time frame: Since the initial planning of the work</b> |                                                                                                                                                                                |                                                                                              |                                                                                                                 |
| 1                                                         | All support for the present manuscript (e.g., funding, provision of study materials, medical writing, article processing charges, etc.)<br><b>No time limit for this item.</b> | National Institutes of Health (NIH)                                                          | Funding to Mayo Clinic through grant R01 EB033008 (Pis: Christine Lee and Matthew Urban)                        |
|                                                           |                                                                                                                                                                                | Mayo Clinic                                                                                  | Funding from an internal Mayo Clinic Discovery Translation Program award (Pis: Christine Lee and Matthew Urban) |
|                                                           |                                                                                                                                                                                |                                                                                              |                                                                                                                 |
|                                                           |                                                                                                                                                                                |                                                                                              |                                                                                                                 |
|                                                           |                                                                                                                                                                                |                                                                                              |                                                                                                                 |
|                                                           |                                                                                                                                                                                |                                                                                              |                                                                                                                 |
| <b>Time frame: past 36 months</b>                         |                                                                                                                                                                                |                                                                                              |                                                                                                                 |
| 2                                                         | Grants or contracts from any entity (if not indicated in item #1 above).                                                                                                       | National Institutes of Health (NIH)                                                          | Funding to Mayo Clinic through grant R01 EB033008 (Pis: Christine Lee and Matthew Urban)                        |
|                                                           |                                                                                                                                                                                | Mayo Clinic                                                                                  | Funding from an internal Mayo Clinic Discovery Translation Program award (Pis: Christine Lee and Matthew Urban) |
|                                                           |                                                                                                                                                                                |                                                                                              |                                                                                                                 |

|    |                                                                                                              |                                        |  |
|----|--------------------------------------------------------------------------------------------------------------|----------------------------------------|--|
| 3  | Royalties or licenses                                                                                        | <input type="checkbox"/> <u>X</u> None |  |
|    |                                                                                                              |                                        |  |
|    |                                                                                                              |                                        |  |
| 4  | Consulting fees                                                                                              | <input type="checkbox"/> <u>X</u> None |  |
|    |                                                                                                              |                                        |  |
|    |                                                                                                              |                                        |  |
| 5  | Payment or honoraria for lectures, presentations, speakers bureaus, manuscript writing or educational events | <input type="checkbox"/> <u>X</u> None |  |
|    |                                                                                                              |                                        |  |
|    |                                                                                                              |                                        |  |
| 6  | Payment for expert testimony                                                                                 | <input type="checkbox"/> <u>X</u> None |  |
|    |                                                                                                              |                                        |  |
|    |                                                                                                              |                                        |  |
| 7  | Support for attending meetings and/or travel                                                                 | <input type="checkbox"/> <u>X</u> None |  |
|    |                                                                                                              |                                        |  |
|    |                                                                                                              |                                        |  |
| 8  | Patents planned, issued or pending                                                                           | <input type="checkbox"/> <u>X</u> None |  |
|    |                                                                                                              |                                        |  |
|    |                                                                                                              |                                        |  |
| 9  | Participation on a Data Safety Monitoring Board or Advisory Board                                            | <input type="checkbox"/> <u>X</u> None |  |
|    |                                                                                                              |                                        |  |
|    |                                                                                                              |                                        |  |
| 10 | Leadership or fiduciary role in other board, society, committee or advocacy group, paid or unpaid            | <input type="checkbox"/> <u>X</u> None |  |
|    |                                                                                                              |                                        |  |
|    |                                                                                                              |                                        |  |
| 11 | Stock or stock options                                                                                       | <input type="checkbox"/> <u>X</u> None |  |
|    |                                                                                                              |                                        |  |
|    |                                                                                                              |                                        |  |
| 12 | Receipt of equipment, materials, drugs, medical writing, gifts or other services                             | <input type="checkbox"/> <u>X</u> None |  |
|    |                                                                                                              |                                        |  |
|    |                                                                                                              |                                        |  |
| 13 | Other financial or non-financial interests                                                                   | <input type="checkbox"/> <u>X</u> None |  |
|    |                                                                                                              |                                        |  |
|    |                                                                                                              |                                        |  |

**Please summarize the above conflict of interest in the following box:**

Funding from R01 EB033008 and Mayo Clinic Discovery Translation Award

**Please place an "X" next to the following statement to indicate your agreement:**

I certify that I have answered every question and have not altered the wording of any of the questions on this form.

## ICMJE DISCLOSURE FORM

Date: September 20, 2024

Your Name: Matthew W. Urban

Manuscript Title: Breast Ultrasound Knobology and the Knobology for Marker Detection

Manuscript number (if known): TBCR-24-30

In the interest of transparency, we ask you to disclose all relationships/activities/interests listed below that are related to the content of your manuscript. "Related" means any relation with for-profit or not-for-profit third parties whose interests may be affected by the content of the manuscript. Disclosure represents a commitment to transparency and does not necessarily indicate a bias. If you are in doubt about whether to list a relationship/activity/interest, it is preferable that you do so.

The following questions apply to the author's relationships/activities/interests as they relate to the current manuscript only.

The author's relationships/activities/interests should be defined broadly. For example, if your manuscript pertains to the epidemiology of hypertension, you should declare all relationships with manufacturers of antihypertensive medication, even if that medication is not mentioned in the manuscript.

In item #1 below, report all support for the work reported in this manuscript without time limit. For all other items, the time frame for disclosure is the past 36 months.

|                                                           |                                                                                                                                                                                | Name all entities with whom you have this relationship or indicate none (add rows as needed) | Specifications/Comments (e.g., if payments were made to you or to your institution) |
|-----------------------------------------------------------|--------------------------------------------------------------------------------------------------------------------------------------------------------------------------------|----------------------------------------------------------------------------------------------|-------------------------------------------------------------------------------------|
| <b>Time frame: Since the initial planning of the work</b> |                                                                                                                                                                                |                                                                                              |                                                                                     |
| 1                                                         | All support for the present manuscript (e.g., funding, provision of study materials, medical writing, article processing charges, etc.)<br><b>No time limit for this item.</b> | National Institutes of Health (NIH)                                                          | Funding to Mayo Clinic through grant R01 EB033008                                   |
|                                                           |                                                                                                                                                                                | Mayo Clinic                                                                                  | Funding from an internal Mayo Clinic Discovery Translation Program award            |
|                                                           |                                                                                                                                                                                |                                                                                              |                                                                                     |
|                                                           |                                                                                                                                                                                |                                                                                              |                                                                                     |
|                                                           |                                                                                                                                                                                |                                                                                              |                                                                                     |
|                                                           |                                                                                                                                                                                |                                                                                              |                                                                                     |
| <b>Time frame: past 36 months</b>                         |                                                                                                                                                                                |                                                                                              |                                                                                     |
| 2                                                         | Grants or contracts from any entity (if not indicated in item #1 above).                                                                                                       | National Institutes of Health (NIH)                                                          | Funding to Mayo Clinic through grant R01 EB033008                                   |
|                                                           |                                                                                                                                                                                | Mayo Clinic                                                                                  | Funding from an internal Mayo Clinic Discovery Translation Program award            |
|                                                           |                                                                                                                                                                                |                                                                                              |                                                                                     |
| 3                                                         | Royalties or licenses                                                                                                                                                          | <input checked="" type="checkbox"/> None                                                     |                                                                                     |
|                                                           |                                                                                                                                                                                |                                                                                              |                                                                                     |

|    |                                                                                                              |                                          |                                                                                                                         |
|----|--------------------------------------------------------------------------------------------------------------|------------------------------------------|-------------------------------------------------------------------------------------------------------------------------|
| 4  | Consulting fees                                                                                              | <input checked="" type="checkbox"/> None |                                                                                                                         |
| 5  | Payment or honoraria for lectures, presentations, speakers bureaus, manuscript writing or educational events | <input checked="" type="checkbox"/> None |                                                                                                                         |
| 6  | Payment for expert testimony                                                                                 | <input checked="" type="checkbox"/> None |                                                                                                                         |
| 7  | Support for attending meetings and/or travel                                                                 | <input checked="" type="checkbox"/> None |                                                                                                                         |
| 8  | Patents planned, issued or pending                                                                           | Pending US Patent                        | 17/398,778: Localizing medical instruments using Doppler Ultrasound Twinkling Artifact Signatures                       |
|    |                                                                                                              | Pending Provisional Patent               | 63/571,622 Vendor Agnostic Tracking of Doppler Ultrasound Twinkling                                                     |
|    |                                                                                                              | Pending EPO and US Patents               | EPO: 20786193.1 Non-metallic Ultrasound Detectable Markers<br>US: 17/762,018 Non-metallic Ultrasound Detectable Markers |
| 9  | Participation on a Data Safety Monitoring Board or Advisory Board                                            | <input checked="" type="checkbox"/> None |                                                                                                                         |
| 10 | Leadership or fiduciary role in other board, society, committee or advocacy group, paid or unpaid            | <input checked="" type="checkbox"/> None |                                                                                                                         |
| 11 | Stock or stock options                                                                                       | <input checked="" type="checkbox"/> None |                                                                                                                         |
| 12 | Receipt of equipment, materials, drugs, medical writing, gifts or other services                             | <input checked="" type="checkbox"/> None |                                                                                                                         |
| 13 | Other financial or non-financial interests                                                                   | <input checked="" type="checkbox"/> None |                                                                                                                         |

**Please summarize the above conflict of interest in the following box:**

Funding from R01 EB033008 and Mayo Clinic Discovery Translation Award, Patents pending related to utilization of Doppler twinkling artifact to locate markers and other objects

Please place an "X" next to the following statement to indicate your agreement:

I certify that I have answered every question and have not altered the wording of any of the questions on this form.
